# Supplementary material
Source: Springer Nature journal article supplement (https://www.springermedizin.de/resource/supplementary/12877_2007_81_MOESM3_ESM.pdf/9441128)

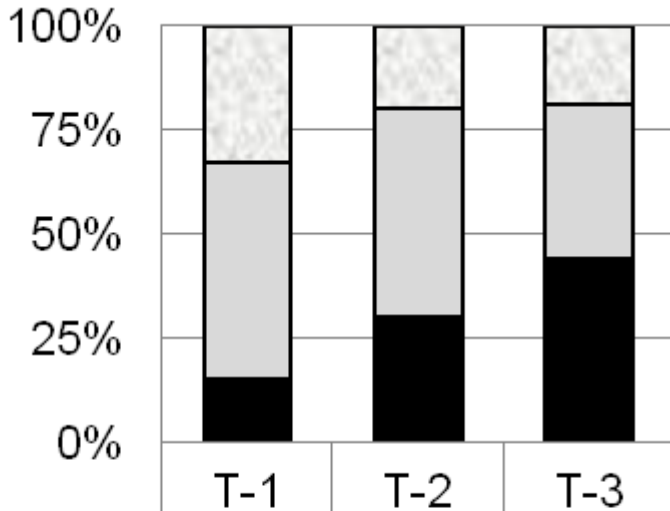

|              |     |     |     |
|--------------|-----|-----|-----|
| □ None       | 33% | 20% | 19% |
| ▒ Occasional | 52% | 50% | 37% |
| ■ Frequent   | 15% | 30% | 44% |

Supplement: MOESM3 [file 9441128]
